# Supplementary material for: Construction of a large scale integrated map of macrophage pathogen recognition and effector systems
Source: Springer Nature journal article supplement (doi:10.1186/1752-0509-4-63), 2010-05-14

## Knowledge driven pathway construction

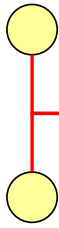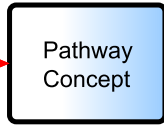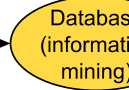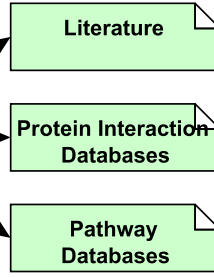

PubMed  
Google Scholar  
  
STRING  
BIND  
  
KEGG  
Reactome  
Ingenuity

## Data driven pathway construction

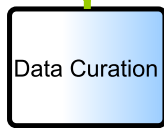

Official HUGO and Entrez IDs  
Nature of interaction  
Interacting components  
PubMed ID/ reference

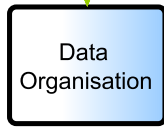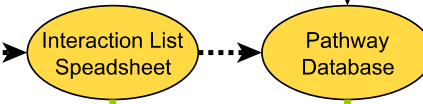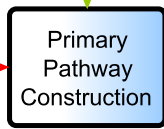

Annotation: -Interaction source/ description  
-Component IDs /url links  
Interaction depiction  
Layout optimisation

Pathway content/  
notation ambiguous

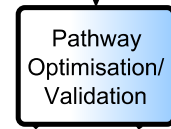

Optimisation of content,  
notation, logic and layout

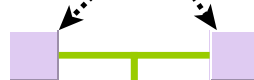

Pathway 'expert' opinion

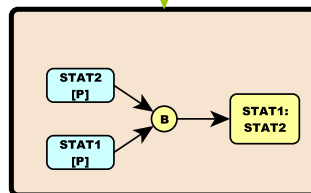

**PATHWAY**

Pathway knowledge  
dissemination

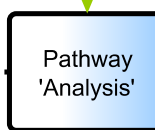

Pathway structure analysis:  
dependencies, relationships, unknowns

Mathematical modelling

Genomics/ biological  
data analysis

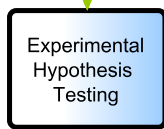

Supplement: 12918_2010_452_MOESM7_ESM.pdf [file 12918_2010_452_MOESM7_ESM.pdf]
