# Supplementary material for: Construction of a large scale integrated map of macrophage pathogen recognition and effector systems
Source: Springer Nature journal article supplement (doi:10.1186/1752-0509-4-63), 2010-05-14

| <b>a</b> Pathway Node Count        |                                |                  |
|------------------------------------|--------------------------------|------------------|
| Node Category                      | Node Type                      | Total            |
| <b>Component</b>                   | Cell                           | 3                |
|                                    | Compartment                    | 21 (18 unique)   |
|                                    | Protein                        | 576 (496 unique) |
|                                    | Protein-Complex                | 412              |
|                                    | Gene                           | 81               |
|                                    | DNA sequence/ Promoter         | 101              |
|                                    | Molecular Species/ Generic     | 45               |
|                                    | Simple-Molecule                | 2                |
|                                    | Drug                           | 4                |
|                                    | Energy/ Molecular Transfer     | 6                |
|                                    | Module Pathway Input/Output    | 91               |
| <b>Boolean Logic</b>               | &                              | 28               |
|                                    | OR                             | 92               |
| <b>Process Node</b>                | Activation (A)                 | 11               |
|                                    | Auto-Catalysis (AC)            | 1                |
|                                    | Auto-Phosphorylation (AP)      | 29               |
|                                    | Auto-Cleavage (AX)             | 8                |
|                                    | Binding (B)                    | 222              |
|                                    | Dissociation (D)               | 45               |
|                                    | Inhibition (I)                 | 2                |
|                                    | Oligomerisation (O)            | 25               |
|                                    | Phosphorylation (P)            | 63               |
|                                    | De-Phosphorylation (-P)        | 3                |
|                                    | Sumoylation (Su)               | 1                |
|                                    | Translocation (T)              | 67               |
|                                    | Transcription/Translation (TL) | 3                |
|                                    | Ubiquitination (Ub)            | 26               |
|                                    | Cleavage (X)                   | 33               |
| Unknown (?)                        | 1                              |                  |
| Sink (Proteasomal Degradation) (/) | 12                             |                  |
| <b>Edge Annotation</b>             | Catalysis                      | 66               |
|                                    | Activation                     | 77               |
|                                    | Inhibition                     | 15               |
| <b>Grand Total</b>                 |                                | <b>2172</b>      |

1000 different interactions are displayed on the pathway. The interactions are supported by 2009 sources of evidence cited from 728 different peer-reviewed publications.

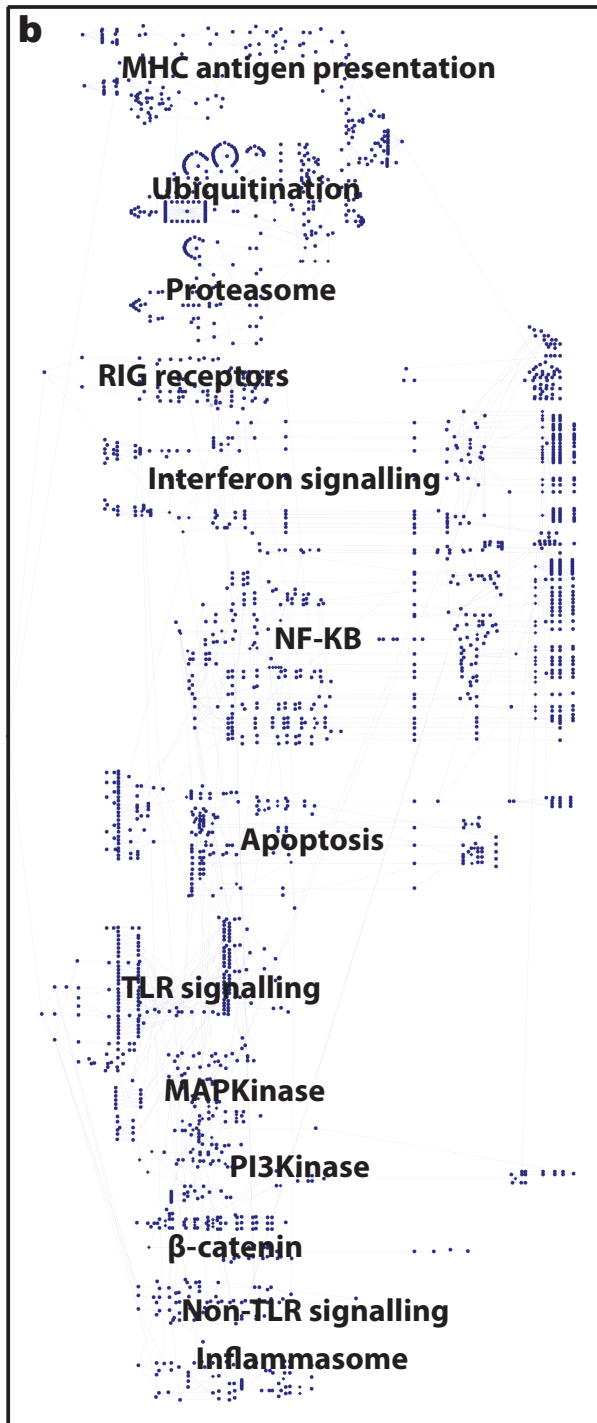

Supplement: 12918_2010_452_MOESM9_ESM.pdf [file 12918_2010_452_MOESM9_ESM.pdf]
