# Supplementary material for: Construction of a large scale integrated map of macrophage pathogen recognition and effector systems
Source: Springer Nature journal article supplement (doi:10.1186/1752-0509-4-63), 2010-05-14

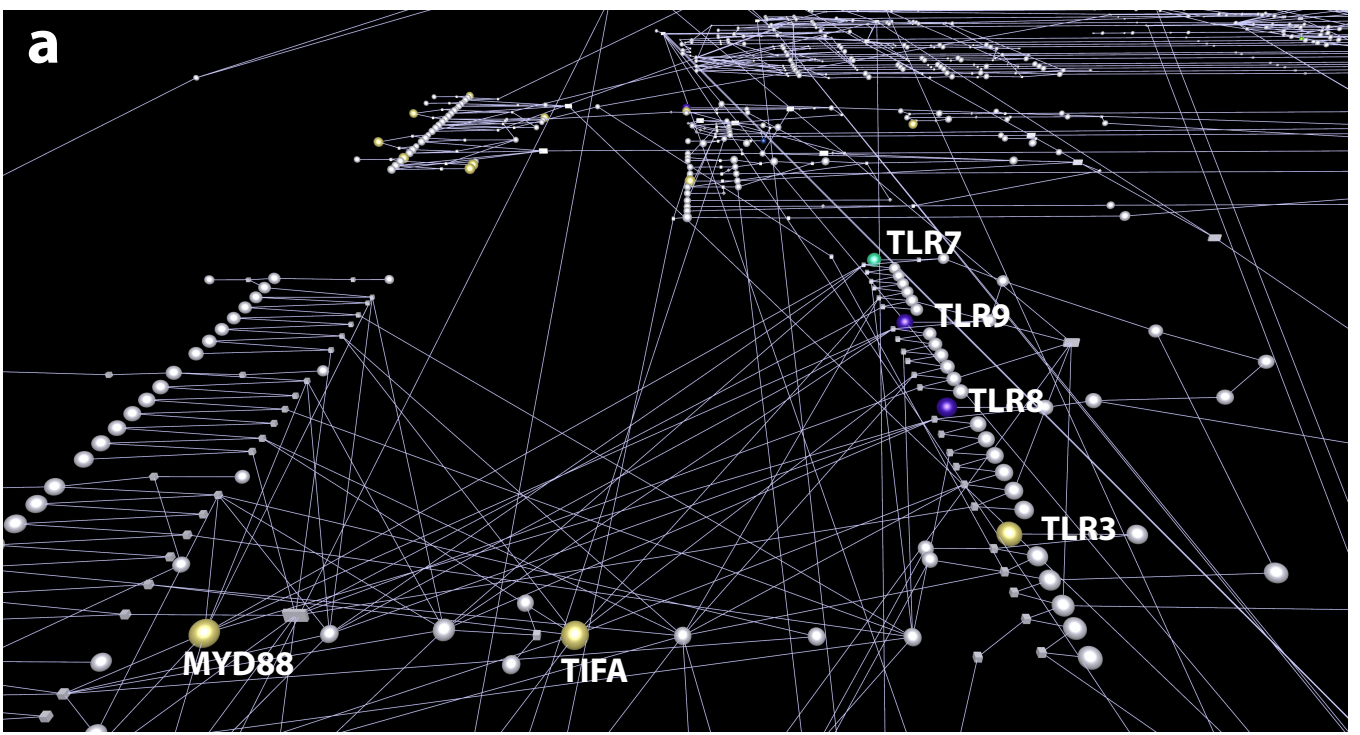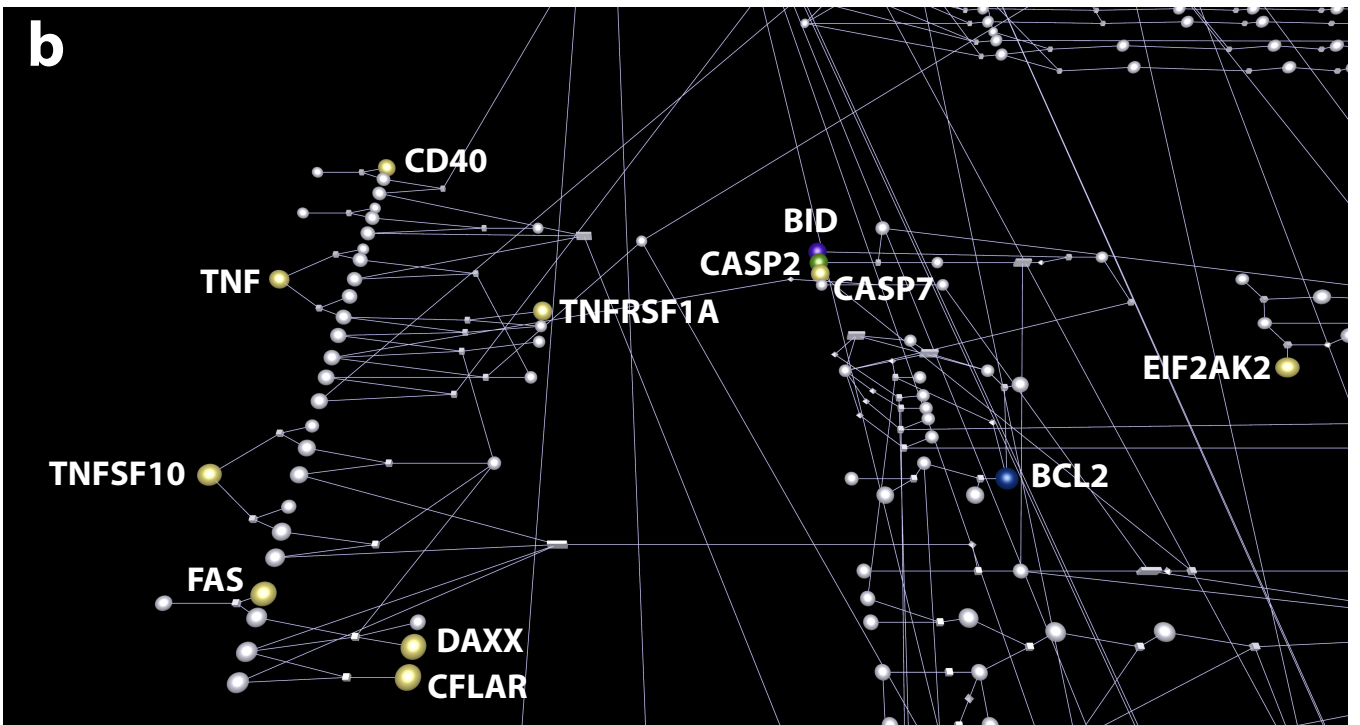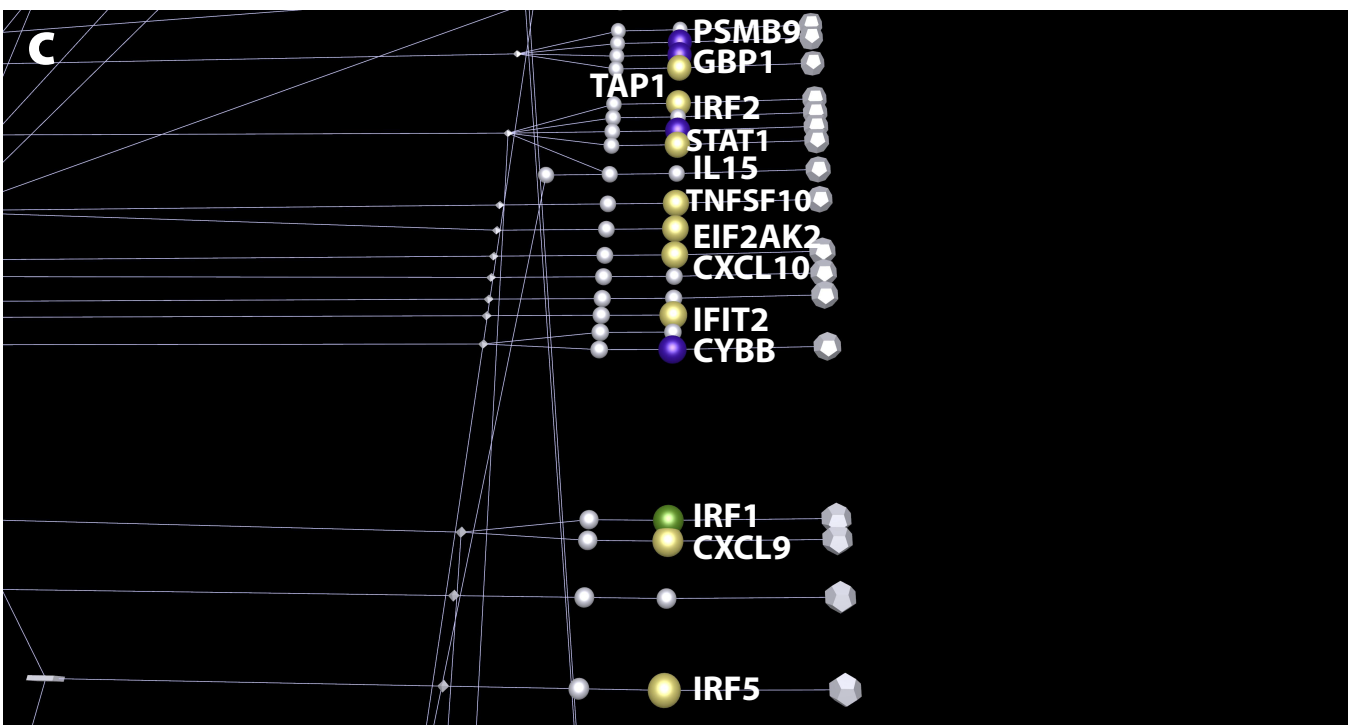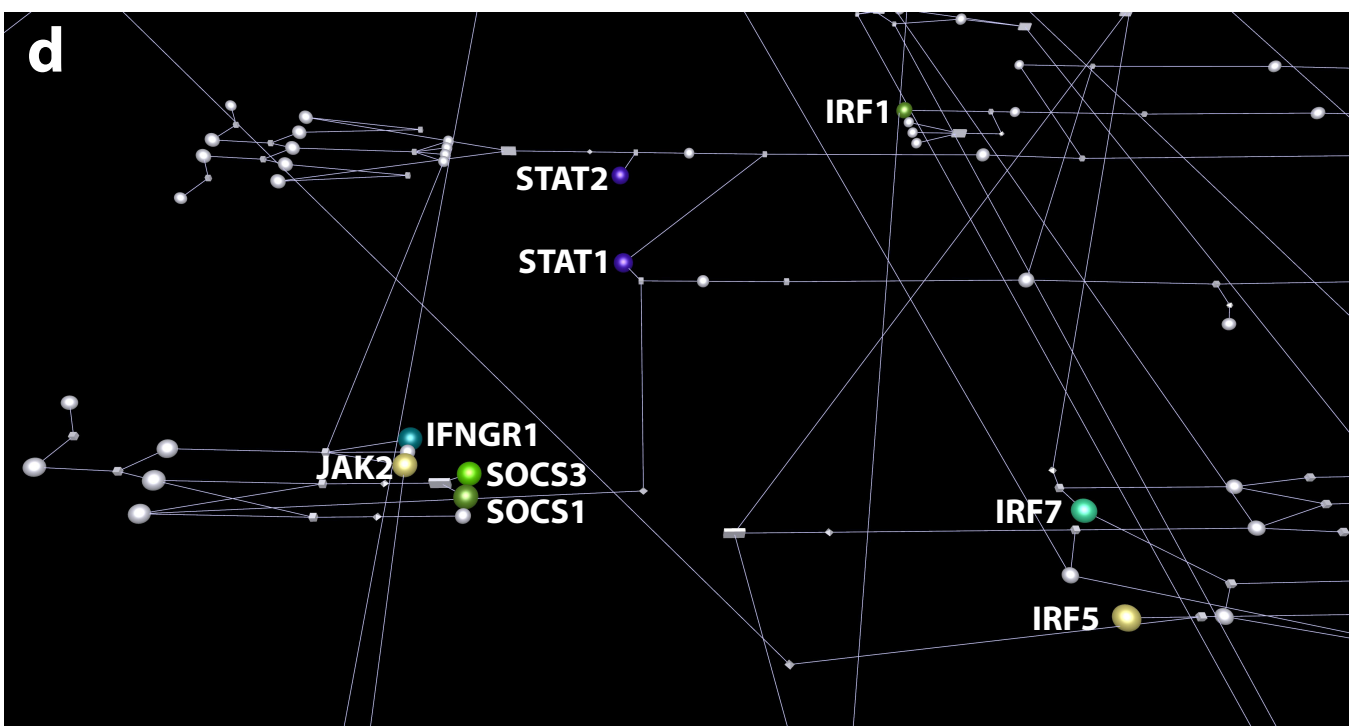

Supplement: 12918_2010_452_MOESM12_ESM.pdf [file 12918_2010_452_MOESM12_ESM.pdf]
